# Supplementary material for: Identification and Characterization of microRNAs during Retinoic Acid-Induced Regeneration of a Molluscan Central Nervous System
Source: Int J Mol Sci. 2018 Sep 13;19(9):2741. doi: 10.3390/ijms19092741 (PMC6163488; doi:10.3390/ijms19092741)
Supplement: Supplementary file 1 [file ijms-19-02741-s001.xlsx]

## Sheet: Normalized reads
Index	miRNA Sequence	miRNA name	Normalized EtOH CNS	Normalized RA CNS	Log2 (RA CNS/EtOH CNS)
1	GAGCTGCCAAATGAAGGGCTGT	lgi-miR-745b_L+1R-1	31974.7	17883.6	-0.838295
2	TGCCATTTTTATCAGTCACTGTG	lgi-miR-1985_R-1	54409.2	31333.4	-0.796151
3	TACCCTGTAGATATCCGAATTTGT	PC-5p-6_292795	192761	118972	-0.696188
4	TTGCATAGTCACAAAAGTGATC	lgi-miR-153	44057.3	27197.3	-0.695917
5	TGCCCTATCCGTCAGGAACTGT	lgi-miR-1984_R-1	33173.2	22377.4	-0.567977
6	AGCTGCCTGATGAAGAGCTGTCC	lgi-miR-745a_R+2	66229	45152	-0.552675
7	TATCACAGTCAGCTTTGATGAGC	PC-3p-13_115471	21825.4	17225.3	-0.341482
8	TTCGTTGTCGTCGAAACCTGCCA	PC-3p-88_16909	19664	15953.9	-0.301648
9	AACCCGTAGAACCGAACTTGT	lgi-miR-100_R-1_1ss11TA	514245	422921	-0.28207
10	TTCGTTGTCGTCGAAACCTGCCT	lgi-miR-981_1ss11AT	627672	521135	-0.268355
11	TGAGATCATTGTGAAAACTGAT	cte-bantam_R-1_1ss20AG	14497.4	12588.8	-0.203661
12	TGGACGGAGAACTGATAAGGGC	lgi-miR-184	293331	263305	-0.155795
13	TCACAACCTGCTTGAATGAGGACT	PC-3p-3_562132	306997	303647	-0.0158295
14	AGATATGTTTGATATATTTGGTG	lgi-miR-190_R+1_1ss17AT	16819.1	16697.4	-0.0104825
15	GCGGGCCGAGCTCGGAACG	PC-3p-87_16928	27427	32400.3	0.240409
16	TGAGGTAGTAGGTTGTATTGTT	lgi-let-7_1ss19AT	42408.8	51286.8	0.274224
17	TCACAACCTGCTTGAATGAGGAC	lgi-miR-67_1ss12AT	127611	183119	0.521032
18	TGAGATTCAACTCCTCCAACTGC	lgi-miR-1175-3p	18444.7	28758.7	0.640798
19	TGAAAGACATGGGTAGTGAGATG	lgi-miR-71_1ss10AT	12718.4	20591.9	0.695155
20	TATTGCTTGAGAATACACGTAA	lgi-miR-137	14347.4	25671.7	0.839387
21	GGGGGTAGAGCACTGT	PC-3p-118043_5	27.562	0.001	-14.7504
22	CTGAAGATACTAAAAAGG	PC-5p-89368_9	13.3058	0.001	-13.6998
23	CGTGAGACAGTTTGGTC	PC-5p-117459_5	10.4545	1.05216	-3.3127
24	CGGGTTTCGCGATGTGCGAAC	lgi-mir-981-p5_1ss14TG	18.0578	4.20865	-2.1012
25	TGAGTATTACTTCAGGTACTGA	lgi-miR-12_1ss11AT	231.901	77.86	-1.57455
26	TCACAGCCATTTTGATGGGC	PC-3p-88314_9	15.2066	5.26081	-1.53134
27	GTGCCTTAAGCCTTGACTCAGG	PC-5p-67128_16	35.1653	12.6259	-1.47776
28	AATGGCACTGGTAGAATTCACGG	lgi-miR-183	78.8842	28.4084	-1.47342
29	TAATCTCGGCTGGTAATTCTGA	lgi-miR-216a_R-1_1ss8AG	11.405	4.20865	-1.43823
30	TAGCACCATTTGAAATCAGTTTTTT	PC-3p-61907_19	14.2562	5.26081	-1.43823
31	TGATTGTCCAAACGCAATTCT	cte-miR-219	39.9173	15.7824	-1.3387
32	AGTGTCTGTCGGAGCGGCCATA	PC-3p-6517_292	714.71	320.909	-1.15519
33	ATCATATGTTTACTGTA	PC-5p-15687_134	100.744	46.2951	-1.12176
34	TGGCGCCGTGGAAACATCTACCCT	PC-3p-40862_41	30.4132	14.7303	-1.04591
35	ATAAAGCTAGGTTACCAAAGGC	lgi-miR-9-3p	365.909	186.233	-0.974378
36	AGATATGTTTGATATATTTGGTGGTTT	PC-5p-69890_15	12.3554	6.31297	-0.968746
37	GTGCATTGTAGTTGCATTGCG	lgi-miR-33-5p_R-1_1ss21AG	267.066	136.781	-0.965328
38	TCAGCAGTTGTACCACTGATTT	lgi-miR-1992_R-1	202.438	104.164	-0.958622
39	TGCCCTATCCGTCAGGAACTGTGGTT	PC-5p-48079_31	39.9173	21.0432	-0.923658
40	NGCCCTATCCGTCAGGAACTGTGA	lgi-miR-1984_R+1_1ss1TN	40.3925	21.5693	-0.905108
41	TATCACAATCATTGGATGGGT	PC-3p-570_1284	873.429	470.316	-0.893059
42	TATCACAGCCAGTATACCCCTG	PC-3p-1631_729	1014.09	552.385	-0.87644
43	TCGGGTTTCGCGATGTGCGAAC	PC-5p-10231_201	133.058	74.7035	-0.832805
44	ACGTCAAGGCGGTTGTGATGTG	PC-5p-50554_29	35.1653	19.9911	-0.814795
45	GAGCTGCCAAATGAAGGGCTGTAA	lgi-miR-745b_L+1R+1_1ss23GA	18.0578	10.5216	-0.779268
46	AGAATTATGTAGGAAAGGTGTTC	PC-5p-715_1145	1235.54	722.835	-0.773399
47	GAGGTGTTTCATAGGCGCTACA	lgi-mir-2722-p5	26.6116	15.7824	-0.753733
48	AGAACTGTGTATGGACATCAGT	PC-3p-17079_123	77.9338	46.2951	-0.751389
49	NGGCGCCGTGGAAACATCTACCT	lgi-miR-2722_R+1_1ss1TN	12.3554	7.36513	-0.746354
50	GAGCTGCCAAATGAAGGGCTGTTT	PC-3p-85399_10	35.1653	21.0432	-0.740794
51	AATCTTTCATACATAATTTTAT	PC-3p-48086_31	22.8099	14.7303	-0.630877
52	AGGCAAGATGTTGGCATAGCTGTT	cte-miR-31_R+3	16.157	10.5216	-0.618804
53	AAGCGGTGATATTTTTGTCTC	PC-5p-63411_19	16.157	10.5216	-0.618804
54	CAGCTTTTGTGATTTAGCAATT	lgi-mir-153-p5	44.6694	29.4605	-0.600503
55	TGCCATTTTTATCAGTCACTGTGAA	lgi-miR-1985_R+1	367.81	246.206	-0.579094
56	CTTACCCTGTAATACTGAGAAGT	PC-5p-18655_112	70.3305	47.3473	-0.570869
57	GAAGACGCTCGAACT	cte-mir-2712-p3_1ss8TC	88.3884	59.9732	-0.559538
58	TAGCACCATTTGAAATCAGTGC	cte-miR-29b_R+1	113.099	77.86	-0.538633
59	ACATACTTCTTTGCTATCCCATT	PC-5p-50672_29	22.8099	15.7824	-0.531341
60	TAGGGCAAAGCTATCACCGATT	PC-3p-124_9283	5762.35	4039.25	-0.51257
61	TGCCCTATCCGTCAGGAACTGTTTTT	hru-miR-1984_R+3_1ss23GT	28.9876	20.5172	-0.498604
62	AGGCAAGATGTTGGCATAGCT	lgi-miR-31	2480.58	1777.1	-0.48115
63	TAATGCTGTCAGGTAAAGATGTC	lgi-miR-8_1ss5AG	5436.36	3965.6	-0.455102
64	GTGAGCAAAGTTTCAGGTGTAT	lgi-miR-87	3229.03	2406.29	-0.424286
65	TATCACAGCCAATAATCCCCAG	PC-3p-12288_171	225.248	168.346	-0.420084
66	TTGTGACCGTTATAATGGGCATT	lgi-miR-2001	1940.74	1467.77	-0.402987
67	ATTATACACCGGTGCCAAAT	lgi-mir-96b-p3	85.5371	66.2862	-0.367842
68	TAGCACCATTTGAAATCAGTTT	lgi-miR-29	8555.61	6630.72	-0.367705
69	GGAACTGGACGGAGAACTGATAAGGGC	lgi-miR-184_L+5	152.858	118.719	-0.364642
70	TGGACGGAGAACTGATAAGGNCA	cte-miR-184a_R+1_1ss21GN	113.891	91.3627	-0.317977
71	TATCACAGCCAGCTTTGATGACA	PC-3p-201_4406	2691.89	2160.97	-0.316941
72	TGAGATCATTGTGAA	cte-bantam_R-8	10.4545	8.4173	-0.312701
73	TATCACAGCCTGCTTGGATCAGT	lgi-miR-2d	6392.48	5242.4	-0.286148
74	TATCACAGCCAGCTTTGATGAC	lgi-miR-2c_R-1_1ss22GC	11032.2	9060.82	-0.284001
75	TGAGATCATTGTGAAAAC	cte-bantam_R-5	357.672	295.307	-0.276422
76	ACTTCAACCGACCTTGA	PC-3p-33298_55	46.5702	38.93	-0.258526
77	TAATGCTGTCAGGTAAAGATGTCC	lgi-miR-8_R+1_1ss5AG	11.8802	9.99554	-0.249198
78	TAATCTCAGCTGGTAATTCTGA	lgi-miR-216a_R-1	46.5702	39.4561	-0.23916
79	TGGAAGACTAGTGATTTAGTTGTT	lgi-miR-7_1ss18TA	543.636	464.003	-0.228506
80	TGAACACAGCTGGTGGTATCTTAC	PC-3p-28702_68	85.5371	74.7035	-0.195375
81	ACATACTTCTTTGCTATCCCATA	lgi-mir-1-p5_1ss10CT	180.578	158.876	-0.18472
82	TAATATCAGCTGGTAATCCTGA	lgi-miR-216b_R-1	5022.93	4475.37	-0.166522
83	CAAACTTTAAATGGGT	sme-mir-2152-p3	55.5358	49.662	-0.161274
84	ATGCCACCTGGCCATCC	PC-5p-45877_34	44.6694	39.9822	-0.15993
85	CATCTACCTATCCTTCTTCTCC	PC-3p-351_1947	1262.15	1141.6	-0.144829
86	TATCACAGCCAGCTTTGATGAGC	lgi-miR-2c_1ss23TC	3741.22	3387.03	-0.143487
87	ACCAGATATCAGACATGTCAC	PC-3p-8399_236	442.892	416.656	-0.0880986
88	TGGACGGAGAACTGAAAGG	cte-miR-184b_R-2_1ss16TA	13.6226	12.9767	-0.0700805
89	GGTTTCGCGGCGGCGAC	PC-5p-37231_47	49.4215	47.3473	-0.0618557
90	AGCTGACTGATGAAGAGCTGTA	lgi-miR-745a_R+1_1ss6CA	14.2562	13.6781	-0.05972
91	CCTATTCTCAAACTTTAAAT	sme-mir-2152-p5_1ss2TC	78.1262	75.7331	-0.0448818
92	TAAGGCACGCGGTGAATGCC	lgi-miR-124_R-1	9444.73	9669.97	-0.034002
93	TTACCCTGGAGAACCGAGCGTGT	PC-5p-37769_46	16.157	15.7824	-0.0338413
94	TGAACACAGCTGGTGGTATCT	lgi-miR-317_R-3	470.296	460.145	-0.0314785
95	AATTGCACTCGTCCCGGCCTGC	lgi-miR-92_1ss10TC	899.09	880.133	-0.0307437
96	TAATGCCCCCTCAAACCCTACA	PC-3p-424_1587	546.487	538.707	-0.0206872
97	CTAAGTACTGGTGCCGCGGGATT	PC-5p-20555_101	64.6281	64.1819	-0.00999458
98	CTAAGTACTGGTGCCGCGGGA	lgi-miR-252a	4466.94	4497.99	0.00999458
99	TCTTTGGTTATCTAGCTGTATGA	lgi-miR-9-5p	404.876	413.5	0.0304068
100	TTTTGATTGTTGCTCAGAAAGCC	lgi-miR-315	437.665	448.747	0.0360755
101	AATTGCACTTACCCCGGCCTGT	PC-3p-284_2666	1622.35	1670.83	0.0424788
102	GTGGTTCGTTGTCGTCGAAACCTGC	cte-miR-981_L+4R-2	27.562	28.4084	0.0436374
103	AGTGGAGAGAGTTTTATCTCATC	lgi-miR-1175-5p_R+1	202.438	209.38	0.0486459
104	ACACCCATATTTCATCCTCCTCC	PC-3p-11736_178	116.901	122.051	0.0621974
105	TAAATGCATTATCTGGTATCT	cte-miR-277a_R-1_1ss20GC	52.2727	54.7124	0.0658109
106	NGGAATGTAAAGAAGTATGTAT	lgi-miR-1_1ss1TN	1716.45	1797.09	0.066241
107	TTTGTTCGTTCGGCTCGCGTT	lgi-miR-375_R-1	1247.89	1307.84	0.0676903
108	TAGGGTACTGCGTGTGTTGCACA	PC-5p-66389_17	18.0578	18.9389	0.0687284
109	AGCTGCCTGATGAAGAGC	lgi-miR-745a_R-3	90.7644	95.2207	0.069148
110	CATTGCACTTTTCCCGGCCTGT	PC-3p-250_3256	1896.07	2020.15	0.0914485
111	CCTTACTACTCTGTCTTTTGCA	lgi-mir-71-p3_1ss1TC	121.653	131.52	0.112515
112	TAGTAGGTTGTATTGTT	lgi-let-7_L-5_1ss19AT	14.7314	16.0455	0.123272
113	AGACATTTGGTTCACGT	PC-3p-46640_33	20.9091	23.1476	0.146731
114	TCTGGGGTGCAGGCTTC	sme-mir-749-p3_1ss3CT	10.4545	11.5738	0.146731
115	AATTGCACTCGTCCCGGCCTGT	PC-3p-21739_95	87.438	96.7989	0.146731
116	CGCCTCGGGCTGACCC	PC-3p-540_1337	2062.4	2284.24	0.147396
117	AATTGCACTAATCCCGGCCTAC	PC-3p-1024_946	1034.05	1150.01	0.153346
118	ATAAGTAGTGGTGCCGCAGGTA	lgi-miR-252b	77.9338	89.4338	0.19857
119	AGTGCTCTGAATGTC	egr-mir-219-p5_1ss11TA	274.669	315.649	0.200624
120	TTTGGTCCCCTTCAACCAGCTGT	lgi-miR-133-3p_L+1	48.471	55.7646	0.202226
121	GAGACGGTGTGAATTTC	PC-5p-12261_171	163.471	188.337	0.204282
122	TTCCACCACGTTCTCGTGG	PC-5p-29251_66	62.7272	73.6513	0.23162
123	TAAGGCACGCGGTGAATGCCATT	sme-miR-124c-3p_R+2	76.033	90.4859	0.251068
124	TTTATTGGAAAGAGCGC	PC-3p-39008_44	21.8595	26.304	0.267025
125	TTAAAGGTAAGCTATAACT	PC-5p-39280_44	19.9587	24.1997	0.277975
126	CCAGATCTAACTCTTCCAGCTC	lgi-miR-750_L+1R-1	4965.91	6027.84	0.279583
127	CCGGTTCACTGCCCGTATT	PC-5p-31376_60	131.157	159.929	0.286134
128	TTTGTTCGTTCGGCTCGCGTTATT	PC-3p-67258_16	14.2562	17.8868	0.327303
129	TGACTAGATCCACACTCATCC	lgi-miR-279_R-1	13.3058	16.8346	0.339376
130	TGAGGTAGTAGATTGTATAGTT	lgi-let-7_1ss12GA	1033.1	1319.41	0.352916
131	TCCCTGAGACCCTAACTTGTGA	cte-miR-125	832.561	1066.89	0.357786
132	GATCTGTAACTTCGGC	PC-5p-79668_11	11.405	14.7303	0.369123
133	TATCACAGCCAGCATTGATGACT	lgi-miR-2c_2ss14TA22GC	29.938	39.4561	0.39827
134	TACCCTGTAGATCCGAATTTGT	lgi-miR-10	2637.39	3501.6	0.408899
135	AACCCGTAGAACCGAACTTGTGAT	lgi-miR-100_R+2_1ss11TA	811.652	1078.47	0.410047
136	NGGAATGTAAAGAAGTATGTATT	lgi-miR-1_R+1_1ss1TN	25.6611	34.7213	0.436238
137	GTAAAGCGGGGAGCGG	PC-5p-33749_54	127.355	172.555	0.438194
138	TCGGTGGGACTTTCGTTCGTTT	lgi-miR-278_1ss21CT	483.76	681.801	0.495059
139	CCTCATCACTTTTCCATCCCGT	PC-5p-25779_78	46.5702	68.3905	0.554389
140	TCTAGTCCGACTTTGTG	PC-3p-25500_79	62.7272	92.5903	0.561768
141	TCGGTGGGACCTCCA	cte-mir-1997-p5_1ss2TC	52.2727	78.9121	0.59419
142	ATAACTAAGCGGAGGA	PC-3p-7136_270	299.38	453.482	0.599067
143	TATTGCACTTCTCCAGGCCTTT	PC-3p-337_2056	1243.14	1892.84	0.606564
144	AGACATGATGAAACAATC	PC-3p-21369_97	38.9669	59.9732	0.622069
145	TAGACGACTTAGTTC	sma-mir-8422-p3_1ss13GT	67.4793	106.268	0.655195
146	TGGCAGTGTGGTTAGCTGGTTGAT	PC-5p-19681_106	66.5289	105.216	0.661304
147	TGTCATGGAGTTGCTCTCTTT	lgi-miR-281-3p_R-1	430.537	682.853	0.665438
148	AAGGGAGCATCCGTCGACAGT	lgi-miR-281-5p_1ss12TC	224.297	368.257	0.715299
149	TGAGATTCAACTCCTCCAACTGTT	cte-miR-1175-3p_R+1_1ss23CT	296.529	488.203	0.71931
150	CTTGTGCGTGTCACAGTAAC	PC-3p-79156_12	11.405	18.9389	0.731693
151	TATTATGCTGCTATTCACGAGA	lgi-miR-1993_1ss11AC	35.1653	58.395	0.731693
152	TGGCGCCGTGGAAACATCTACC	lgi-miR-2722	6922.81	11566.4	0.740513
153	CGTTGGAGGATTGGATCTTAGC	PC-5p-22348_92	49.4215	83.1208	0.750072
154	TCACAACCTGCATGAATGAGGACT	lgi-miR-67_R+1	38.0165	65.234	0.778999
155	TAGACGACTTAGTTCTC	PC-5p-24127_84	32.314	55.7646	0.787189
156	AAGGGAGCATCCGTCGACAGTC	PC-5p-30496_62	36.1157	63.1297	0.805694
157	AACCACTCCCCACATTACCGCC	PC-3p-52299_27	18.0578	31.5649	0.805694
158	TGGCAGTGTGGTTAGCTGGTTGA	lgi-miR-34_2ss21AT23TA	591.157	1084.78	0.875789
159	TATTGCTTGAGAATACACGTATT	lgi-miR-137_R+1_1ss22AT	25.6611	53.6603	1.06427
160	TACTGGCCTTCAAAATCCCAA	lgi-miR-193_R-1_1ss10GT	33.2644	72.5992	1.12597
161	CTGGCAGTGTGGTTAGCTGGTTGA	cte-miR-34_L+1_1ss24TA	7.6033	16.8346	1.14673
162	TGAGACAGTGCGTCCTCCCTCA	lgi-miR-1994b_1ss11TC	674.318	1519.32	1.17193
163	NGATATGTTTGATATAGTTGGTG	cte-miR-190_R-1_2ss1AN17TG	21.8595	49.9777	1.19302
164	TGAGACAGTGCGTCCTCCCTCAT	PC-3p-17997_117	65.5785	153.616	1.22803
165	ACGGGTATTCTTGGGTAAATAAT	cte-mir-137-p5	4.75206	11.5738	1.28423
166	GGGAACTGTGGTGTGTGG	PC-5p-51004_28	20.9091	51.5559	1.30201
167	ATTTGGCACTTGTAGAATAATCG	lgi-miR-96b_1ss14GA	8.55371	22.0954	1.36912
168	TACTGGCCTTCAAAATCCCAAA	PC-3p-12968_162	80.7851	209.38	1.37396
169	ATTCGAATGGCACTGAAT	PC-3p-90789_8	7.6033	19.9911	1.39466
170	NGGAGTCGGGTTGTTT	PC-3p-141103_3	4.75206	12.6259	1.40977
171	TGAAAGACATGGGTAGTGAGATGATT	sme-miR-71c-5p_R+4	16.157	49.4516	1.61386
172	TGAGACAGTGTGTCCTCCCTTGT	lgi-miR-1994a_R+1	579.276	1877.06	1.69615
173	TCCCTGAGACCATAAT	sme-miR-125b-5p_R-6_1ss10TC	7.6033	25.2519	1.73169
174	CGGGAACCCGTAGAACCGAACTTGT	cte-miR-100_L+4R-1_1ss13CG	19.9587	69.4427	1.79881
175	TGAGACAGTGTGTCCTCCCATGT	lgi-miR-1994a_R+1_1ss20TA	2.85124	21.0432	2.8837
176	CTTGGCACTGGCGGAATAGTCACT	PC-5p-23426_87	16.157	155.72	3.26872
177	CTTGGCACCAAAGAATTCACTGA	PC-5p-44031_36	3.80165	42.0865	3.46866
178	CTTGGCACTGGCGGAATAGTCA	lgi-miR-96a_1ss19AG	162.521	1822.34	3.4871
179	AGCCTTGGACCAGGAGATT	PC-3p-8526_233	11.405	360.892	4.98383
180	TAAGGCACGCGGTGAATGATT	sme-miR-124a-3p_1ss19CA	0.001	16.8346	14.0391
181	CCCGTGGGACCCGGGT	PC-3p-72816_14	0.001	18.9389	14.2091
182	TTTACATTGGACTTTGAAATT	PC-5p-193085_2	6.65289	0.001	-12.6998
183	TCAGCTCCCCCTGGAGCC	PC-3p-138319_3	5.70248	0.001	-12.4774
184	GCTTGAGAGAACTCT	sme-mir-2151-p5_1ss5AG	4.75206	0.001	-12.2143
185	AGAGGGGGTTGCGACTGTT	PC-5p-397978_1	4.75206	0.001	-12.2143
186	AGCTGTGTCATATGTTGCCAAT	PC-3p-149634_3	4.75206	0.001	-12.2143
187	GTCGCGAGTTCGAAT	gsa-mir-9394b-p3_1ss14TA	3.80165	0.001	-11.8924
188	CCGAGAGGGAAAGAACC	PC-5p-182416_2	2.85124	0.001	-11.4774
189	TAAAGCTAGGTTACCAAAGGNAT	lgi-miR-9-3p_L-1R+2_1ss22CN	2.85124	0.001	-11.4774
190	CCTGAGACCATAATA	sme-miR-125b-5p_L-2R-5_1ss10TC	2.85124	0.001	-11.4774
191	TGAACACAGCTGGTGGTATCTTTTTT	cte-miR-317_R+1_1ss22CT	2.85124	0.001	-11.4774
192	CCTCTTTCAGTGGGATTGTG	PC-5p-193863_2	2.85124	0.001	-11.4774
193	TGCCATTTTTATCAGTCACTGTGTTCT	hru-miR-1985_R+4	2.85124	0.001	-11.4774
194	GCCAACCAGGAGATTTGT	PC-5p-243528_2	2.85124	0.001	-11.4774
195	TGAACAAAAAAGAATT	sma-mir-8457-p5_1ss5AC	1.90083	0.001	-10.8924
196	CACAGTAAATACTTCATCT	PC-5p-212535_2	1.90083	0.001	-10.8924
197	AAAACAAATGTTGACGCAA	PC-3p-178105_2	1.90083	0.001	-10.8924
198	TCCCGTGGTCACAACCTGC	PC-5p-674964_1	1.90083	0.001	-10.8924
199	TAAGCTTTTGTTGATTTTCT	PC-5p-303926_1	1.90083	0.001	-10.8924
200	TCAATTGAAATGTTAGGCC	PC-5p-264847_2	1.90083	0.001	-10.8924
201	TACTAGAAATCTAGTAAAA	PC-3p-324225_1	1.90083	0.001	-10.8924
202	TAAGAAGAGGAAACTCTGGT	PC-3p-213137_2	1.90083	0.001	-10.8924
203	GGTGTTGGTTGATTTAGG	PC-3p-301479_1	1.90083	0.001	-10.8924
204	AACCAGCCCTGAAATGGAT	PC-3p-284601_1	1.90083	0.001	-10.8924
205	TTTATCTATTTTTGTTGTTGCT	PC-5p-188256_2	1.90083	0.001	-10.8924
206	TGAGGTAGTAGGTTGTAGT	PC-5p-925269_1	1.90083	0.001	-10.8924
207	TATGAACTGAAATCTTGGC	PC-5p-672301_1	1.90083	0.001	-10.8924
208	GGATTTTTTGGGACTTATT	PC-5p-207407_2	1.90083	0.001	-10.8924
209	TTAAGTATTGTTGTATATT	PC-5p-853944_1	1.90083	0.001	-10.8924
210	TTTTCCTGAATGTTATTTTT	PC-5p-249366_2	1.90083	0.001	-10.8924
211	TAAATGAATGAAAGA	sme-let-7d-p3_1ss8TA	1.90083	0.001	-10.8924
212	TATAACATCAGGAAGCAATA	PC-3p-243260_2	1.90083	0.001	-10.8924
213	CTGTAGATCCGAATTTGTGT	lgi-mir-10-p5	1.90083	0.001	-10.8924
214	TCGAGCTGAAACTTGGCACA	PC-3p-639729_1	1.90083	0.001	-10.8924
215	ATGGTGCAAAGTTTAAATT	PC-3p-791283_1	1.90083	0.001	-10.8924
216	CTAGAGAAAAGTAGGGCGG	PC-5p-873354_1	1.90083	0.001	-10.8924
217	CTATTGTGGGCGTGG	lgi-mir-1986-p5_1ss13CT	0.950413	0.001	-9.89241
218	GATGTGATCTGAGATT	gsa-bantam-p5_1ss1CG	0.950413	0.001	-9.89241
219	TGGAAAGGTTGTTGAAGTT	PC-5p-639172_1	0.950413	0.001	-9.89241
220	CTCACTGCTTTATTGT	sma-mir-61-p5_1ss13GT	0.950413	0.001	-9.89241
221	GCAGATCGGTGGTAG	sja-miR-3500_L-1R-5_1ss3GC	0.950413	0.001	-9.89241
222	GACGATCCGGTCGGG	cte-mir-193-p5_1ss9AG	0.950413	0.001	-9.89241
223	AGGATGGCTAGACTTATC	PC-5p-748899_1	0.950413	0.001	-9.89241
224	TTCTCTGTCTGTTTGTTTCTCT	PC-3p-953788_1	0.950413	0.001	-9.89241
225	GTGAGAGCTGTCGGGA	cte-mir-2716-p3_1ss8AC	0.950413	0.001	-9.89241
226	GGATGCCCTTAGATG	sja-mir-10-p5_1ss8GC	0.950413	0.001	-9.89241
227	ATGTTCGTGAGGGGGA	sma-mir-3479-p5_1ss6TC	0.950413	0.001	-9.89241
228	ATCCGACTTTCTAATTAAA	PC-5p-679290_1	0.950413	0.001	-9.89241
229	TGAAAAGAACTGAAGAGAG	PC-5p-613526_1	0.950413	0.001	-9.89241
230	ACTTTGTTTTATTTT	sma-miR-8456-5p_L-2R-2	0.950413	0.001	-9.89241
231	AGATTTTGATGAATT	sme-miR-2157-3p_L-1R-6_1ss4TA	0.950413	0.001	-9.89241
232	GTTCATGATGTAATGCA	sme-mir-2171-p3_1ss14GT	0.950413	0.001	-9.89241
233	ACTACAGCGTAGAGATGTCT	PC-3p-766388_1	0.950413	0.001	-9.89241
234	TGATGGTGGATGTTGATGG	PC-5p-543205_1	0.950413	0.001	-9.89241
235	ATTTGGCACTTGTGTAATAATCGA	lgi-miR-96b_R+1_1ss15GT	0.950413	0.001	-9.89241
236	TTGTTTTTTGTTTCTGTCC	PC-5p-258157_2	0.950413	0.001	-9.89241
237	TCGCGAGTTCGAATCT	cte-mir-125-p3_1ss10AC	0.950413	0.001	-9.89241
238	TCCCTGAGACCCTTTAA	sja-miR-125a_R-5_1ss16GA	0.950413	0.001	-9.89241
239	ACGACCTGTACAGCC	cte-let-7-p3_1ss5AC	0.950413	0.001	-9.89241
240	TCCATGCGGTCCTTGT	sma-mir-8446-p5_1ss6CG	0.950413	0.001	-9.89241
241	TGTTGTTAAATGTTGTTGT	PC-5p-705372_1	0.950413	0.001	-9.89241
242	CTGTGTTTAGTCTTTATG	sma-mir-8438-p3_1ss1AC	0.950413	0.001	-9.89241
243	GGCTGCCTGATGAAGAGCT	lgi-miR-745a_R-2_1ss1AG	0.950413	0.001	-9.89241
244	ACACAAGTCTCTGTA	sme-mir-2154-1-p3_1ss11TC	0.950413	0.001	-9.89241
245	GGTTCGAGTCCACCT	sme-mir-749-p3_1ss8TG	0.950413	0.001	-9.89241
246	TCTTGATCAACACAGAGA	PC-5p-973126_1	0.950413	0.001	-9.89241
247	TCACAAGTGGAAGAGGGG	PC-3p-948998_1	0.950413	0.001	-9.89241
248	ATCATGGCAATGTGTGACT	PC-5p-917692_1	0.950413	0.001	-9.89241
249	TCACAGCCATTTTGAT	cte-mir-2709-p3_1ss8TC	0.950413	0.001	-9.89241
250	AAAAGACAACTTGGC	sma-mir-8415-p3_1ss14AG	0.950413	0.001	-9.89241
251	TGAACTCATAAACCT	sme-mir-753e-p5_1ss4TA	0.950413	0.001	-9.89241
252	CTGTACAACCTTCTAGCTTTC	lgi-let-7-p3	0.950413	0.001	-9.89241
253	TGAGACAGTGCGTCCTCCCTCAGGC	lgi-miR-1994b_R+3_1ss11TC	0.950413	0.001	-9.89241
254	GCGGGTCGGCGCCTC	sja-mir-71b-p3_1ss5TG	0.950413	0.001	-9.89241
255	CTTATTAAATAGGTTTGGGG	PC-3p-683062_1	0.950413	0.001	-9.89241
256	CAATGTATGTAAGCTGAAA	PC-5p-426062_1	0.950413	0.001	-9.89241
257	CGAGGAAGGTCCTGGGT	cte-mir-2718-p5_2ss8TG17GT	0.950413	0.001	-9.89241
258	CCCCGCTTGGAACCA	egr-mir-2a-p3_1ss4TC	0.950413	0.001	-9.89241
259	AACAGATTGTGCGGTGCCC	PC-3p-579831_1	0.950413	0.001	-9.89241
260	GCTTGTTTTGATGTT	sma-mir-8464-p3_1ss13TG	0.950413	0.001	-9.89241
261	CTGTCTGTCTGTCTG	cte-mir-2720-p5_1ss4CT	0.950413	0.001	-9.89241
262	GTAGCTGGTTGAACC	cte-mir-133-p5_1ss14AC	0.950413	0.001	-9.89241
263	ATCGGTTAGGACGCC	egr-miR-8_L-8_1ss9TA	0.950413	0.001	-9.89241
264	TTAGTAGAATCAGCG	sme-mir-61b-p3_1ss12CA	0.950413	0.001	-9.89241
265	TCGTCCTTTGCCTCT	cte-miR-2715_L-8R-1_1ss14TC	0.950413	0.001	-9.89241
266	CGTGACCTTTGTGACCC	lgi-mir-2001-p5_1ss17GC	0.950413	0.001	-9.89241
267	TGTCATGGAGTTGCTCTTTA	gsa-miR-281-3p_R-2_1ss19CT	0.475206	0.001	-8.89241
268	TTTTGATTGTTGCTCAGAAAGCCGAT	PC-5p-414557_1	0.475206	0.001	-8.89241
269	CTGTTGAGCAAAGTT	cte-mir-87a-p3_1ss4GT	0.475206	0.001	-8.89241
270	CAGTTGGTTAGAGCGCC	sja-mir-3488-p3_1ss1TC	1.10881	0.17536	-2.66062
271	AGGAATAATCTGAAGATCATCT	PC-5p-158067_3	5.70248	1.05216	-2.43823
272	TCAGTTGGTTAGAGC	sja-mir-3488-p3_1ss2TC	5.70248	1.05216	-2.43823
273	CAAACTTTAAATGGGTA	sme-mir-2152-p3_1ss17TA	2.09091	0.420865	-2.3127
274	ATAGGATATAATATACTT	PC-5p-137809_4	4.75206	1.05216	-2.1752
275	AGTAATTACTTGTTGTTT	PC-3p-122044_4	2.37603	0.526081	-2.1752
276	GTTCTGTCCTCGGTCGTGC	PC-5p-188549_2	3.80165	1.05216	-1.85327
277	ACCAGATATCAGACATGTC	cte-mir-190-p3_1ss12AG	3.80165	1.05216	-1.85327
278	TCACCGGGTATACATTCATCCGC	PC-3p-88618_9	5.22727	1.57824	-1.72774
279	TGTTTGATATATTTGGTG	cte-miR-190_L-5R-1	0.792011	0.26304	-1.59023
280	TGTAATGTACATGATT	sma-mir-8435-p3_1ss3GT	5.70248	2.10432	-1.43823
281	GTAAGCAAAGTTTCAGGTGTATT	PC-3p-259068_2	1.42562	0.526081	-1.43823
282	TTCGTTGTCGACGAAACCTGCCA	lgi-miR-981_1ss23TA	5.70248	2.10432	-1.43823
283	TTGCACAAGAAGATTTGAA	PC-5p-208448_2	2.85124	1.05216	-1.43823
284	CTTGCATAGTCACAAAAGTTAT	lgi-miR-153_L+1R-1_1ss20GT	5.70248	2.10432	-1.43823
285	TTCGGGGGTTGGCCGCCA	PC-3p-100187_7	8.55371	3.15649	-1.43823
286	TTCTCAAACTTTAAATGG	sme-mir-2152-p5	1.69717	0.801647	-1.08209
287	TAAGGCACGCGGTGAATGCCAGGAC	cte-miR-124_R+4	2.21763	1.05216	-1.07566
288	ATTATACACCGGTGCCAAATAAT	lgi-mir-96b-p3_1ss23CT	8.55371	4.20865	-1.02319
289	CACGTCAGAGTGACTGTGATTT	PC-5p-113115_5	8.55371	4.20865	-1.02319
290	TCAAACTTTAAATGGGTA	sme-mir-2152-p5_1ss18TA	3.67493	1.89389	-0.956363
291	TTTTGTTCGTTCGGCTCGCGTNG	lgi-miR-375_L+1_2ss22TN23AG	3.80165	2.10432	-0.853269
292	TAATGCTGTCAGGTAAAGATGTCTT	PC-3p-126642_4	5.70248	3.15649	-0.853269
293	AGGTTGTGACAAGTGCAGTCT	PC-5p-135873_4	7.6033	4.20865	-0.853269
294	TTGACTTTAAGAGTTTTAA	PC-5p-158877_3	1.90083	1.05216	-0.853269
295	TACTTTTCTTTGTTTTGCT	PC-5p-222811_2	1.90083	1.05216	-0.853269
296	ATTGCACTAATCCCGGCCT	cte-miR-92a_L-1R-2_1ss11GA	0.950413	0.526081	-0.853269
297	CGTGGAGATTTGTAT	sma-miR-8468-3p_L+1R-6	1.90083	1.05216	-0.853269
298	TCGTCCCCCAGCTGAACCA	PC-5p-119107_5	2.85124	1.57824	-0.853269
299	AGAACTTTGAAGGAGAGT	PC-5p-253922_2	1.90083	1.05216	-0.853269
300	GTAATGAATGATGACATTT	PC-3p-158304_3	0.950413	0.526081	-0.853269
301	GGACTCGGGTTGTTTGGG	PC-5p-292766_1	1.90083	1.05216	-0.853269
302	GATGATGATGACATATTTT	PC-5p-190144_2	1.90083	1.05216	-0.853269
303	TGGATCAACAATTTGAATT	PC-3p-146310_3	1.90083	1.05216	-0.853269
304	GTTCGCGATGTTACTGTGCA	PC-5p-608063_1	1.90083	1.05216	-0.853269
305	AGATCCCGGACGGGCCCC	PC-3p-75744_13	9.50413	6.31297	-0.590235
306	ACTAATAGGAACGTGAGCT	PC-3p-162483_3	5.70248	4.20865	-0.438232
307	CTATTCTCAAACTTTAAA	sme-mir-2152-p5_1ss1TC	4.3719	3.36692	-0.376831
308	TAGCACCATTTGAAATCAGTTTAT	lgi-miR-29_R+2	9.50413	7.36513	-0.367842
309	CCTGGAACAATAAACAATA	PC-5p-105373_6	6.65289	5.26081	-0.338696
310	AACTGGTGTGTGGGACG	PC-5p-153139_3	3.80165	3.15649	-0.268307
311	AAGTTTCAGGTGTAT	cte-miR-87b_L-7	3.80165	3.15649	-0.268307
312	TAAGGCACGCGGTGAATGCCAAAA	egr-miR-124a_R+3	1.26722	1.05216	-0.268307
313	CGTCTTACCTAGCAGCATTGGA	PC-5p-66326_17	9.50413	8.4173	-0.175197
314	TGCCATTTTTATCAGTCACTGTGTAA	PC-5p-121582_4	5.70248	5.26081	-0.116303
315	AGGGATTATGCTGAACGCC	PC-5p-172570_2	6.65289	6.31297	-0.0756615
316	TAAGGCACGCGGTGAATGCCAATA	lgi-miR-124_R+3	2.21763	2.10432	-0.0756615
317	GTTTGATATATTTGGT	cte-miR-190_L-6R-2	1.10881	1.13984	0.0398157
318	ACCATCTGAGGGATGGC	PC-3p-203160_2	1.90083	2.10432	0.146731
319	TGGGTGCAGATCTTGGTG	PC-5p-214492_2	2.85124	3.15649	0.146731
320	TGTGCCAAGTGGCCACTTT	PC-5p-751657_1	0.950413	1.05216	0.146731
321	TATTTGTGTCATAATGTTTG	PC-3p-200747_2	0.475206	0.526081	0.146731
322	TCCCTGAGATCCTAACTTGT	cte-miR-125_R-2_1ss10CT	0.950413	1.05216	0.146731
323	TGTTGTAAGGGGCCAATGT	PC-5p-851070_1	0.950413	1.05216	0.146731
324	AAGCTCGCTTGATTTGATT	PC-5p-236376_2	0.950413	1.05216	0.146731
325	TGAGATTCAACTCCTCCAACTGTAA	lgi-miR-1175-3p_R+2_1ss23CT	0.950413	1.05216	0.146731
326	TAATGCTGTCAGGTA	sme-miR-8b-3p_R-8_1ss5AG	0.475206	0.526081	0.146731
327	TCACCGTGGATGCCT	sma-mir-8481-p5_1ss14TC	0.950413	1.05216	0.146731
328	CCGGGTGCGCATCTTGGTG	PC-3p-565772_1	1.42562	1.57824	0.146731
329	CTCAGTTGGTTAGAGCGCC	sja-mir-3488-p3_1ss3TC	0.158402	0.17536	0.146731
330	CAGCGTCTGTGGAGC	cte-mir-2g-p5_1ss13TA	0.950413	1.05216	0.146731
331	TGCATGTGTTTAGGTTTGTC	PC-5p-220783_2	0.950413	1.05216	0.146731
332	TTTCATGTCTGAAGAAGAA	PC-5p-909958_1	0.950413	1.05216	0.146731
333	GTAGTAGGTTGTATTGT	lgi-let-7_L-4R-1_1ss19AT	0.712809	0.789121	0.146731
334	AGGCAAGCTGCTGGCATAGCT	sme-miR-31b-5p_R-2_1ss8AC	0.950413	1.05216	0.146731
335	TATCACAGCCCGCTTTGCTGAC	cte-miR-2a_R-1_1ss18TC	0.950413	1.05216	0.146731
336	TGGTGATATGGTGTA	egr-mir-7-p5_1ss11TG	0.950413	1.05216	0.146731
337	TTTTATCGTTTCCTTACTT	PC-5p-1026971_1	0.950413	1.05216	0.146731
338	GTGCTATGATGAAAAGAAT	PC-3p-131178_4	2.85124	3.15649	0.146731
339	TAACACTGTCTGGTAAAGA	PC-3p-1070610_1	0.950413	1.05216	0.146731
340	TTGGTCCCCTTCAATCAG	lgi-miR-133-3p_R-4_1ss15CT	1.90083	2.10432	0.146731
341	CTGGGGTGCAGGCTTC	sme-mir-749-p5_1ss2CT	2.85124	3.15649	0.146731
342	TGGTTTCGGAACTGGAGGT	PC-3p-1065462_1	0.475206	0.526081	0.146731
343	TTTTGATTGTTGCTCAGAAAGCCTTT	cte-miR-315_R+3	3.80165	4.20865	0.146731
344	GACAATGTTTGTAACATGT	PC-5p-298653_1	0.950413	1.05216	0.146731
345	TGGCAGTGTGGTTAGCTGGTNGA	lgi-miR-34_2ss21AN23TA	0.950413	1.05216	0.146731
346	TCTAGTCCGACTTTGAAGA	PC-3p-491679_1	0.950413	1.05216	0.146731
347	TGCAAGTGATGATGATAAA	PC-5p-258878_2	0.950413	1.05216	0.146731
348	TCACCGGGTATACATTCATC	gsa-miR-36-3p_R-3_1ss11GT	0.950413	1.05216	0.146731
349	TGACTTAATTTCAACTTTTT	PC-5p-136253_4	1.90083	2.10432	0.146731
350	TCTGGGATAACTGGCTTGT	PC-5p-914296_1	0.950413	1.05216	0.146731
351	ATTGGGATTTTCGGGACTTAGT	PC-5p-641303_1	0.950413	1.05216	0.146731
352	TCAATCTCGGTGGGA	sme-mir-278-p3_1ss5GT	1.90083	2.10432	0.146731
353	AGCTCCCTGATGAAGAGCTGT	lgi-miR-745a_1ss5GC	0.950413	1.05216	0.146731
354	TGAACACAGCTGGTGGTAT	lgi-miR-317_R-5	4.11845	5.61153	0.446291
355	CGTTTCTTTACTTCAGTA	PC-3p-251738_2	3.80165	5.26081	0.468659
356	GGTAGTAGGTTGTATTGT	lgi-let-7-p5_1ss16AT	0.712809	1.05216	0.561768
357	TCTGCAATTAAAAAGATAAC	PC-3p-97577_7	2.85124	4.20865	0.561768
358	TATCACAGCCAGCTTTGATAACT	cte-miR-2c_R+1_1ss22GC	2.37603	3.68257	0.632158
359	TTTTGGTCAGTCTCAGTCT	PC-3p-140416_3	1.90083	3.15649	0.731693
360	TCTTGACTCTCATCTGAGT	PC-5p-142413_3	1.90083	3.15649	0.731693
361	ACCCTGTAGATCCGAATTTGA	sme-miR-10b-5p_L-1_1ss17GA	1.90083	3.15649	0.731693
362	TTTCTTTACTTATTC	sme-mir-277a-p5_1ss10GT	3.80165	6.31297	0.731693
363	TTCTCGTTTCACAGGGTATTTT	lgi-mir-1991-p3_1ss20AT	4.75206	8.4173	0.824803
364	GTGCATTGTAGTTGCATTGCGG	PC-5p-96454_7	4.75206	9.46946	0.994728
365	TTTGAGAATTAGAAAAACC	PC-5p-144049_3	1.90083	4.20865	1.14673
366	CGTGATCGTTCCATTCGCTCGT	PC-5p-118356_5	3.80165	8.4173	1.14673
367	TTCTGTTTGCATACTTGTA	PC-3p-122275_4	1.90083	4.20865	1.14673
368	TGGAAGACTAGTGATTTTGTTGTG	lgi-miR-7_1ss24TG	1.90083	4.20865	1.14673
369	TATATTGTGTCTTTGTTCA	PC-3p-136653_4	1.90083	4.20865	1.14673
370	TCATGAAACTTCTAGAACT	PC-5p-82779_10	3.80165	8.4173	1.14673
371	CGCTCGGGCTACAATCAAACAC	PC-3p-78445_12	3.32644	7.36513	1.14673
372	ATCATTAGACCGTCGTGAG	PC-3p-1067623_1	0.950413	2.10432	1.14673
373	TTGTAGTTGCATTGC	cte-miR-33_L-5R-1	0.950413	2.10432	1.14673
374	NCTTACTACTCTGTCTTTTGCA	lgi-mir-71-p3_1ss1TN	1.90083	4.20865	1.14673
375	GGCAACAGGCATGTATCTC	PC-5p-981018_1	0.950413	2.10432	1.14673
376	TGAAGAATTACTTGAAGAATT	PC-5p-800134_1	0.950413	2.10432	1.14673
377	TATTGCACTTGTCCCGGCCTG	cte-miR-92c_L+1R-2	3.80165	8.4173	1.14673
378	GACCCTGTAGAACCGGATTTGT	cte-mir-10c-p5_3ss16AG17GA18CT	0.950413	2.10432	1.14673
379	TTCTCAATGTAGTCT	cte-miR-2686a-3p_L-6R-1_1ss19GT	0.950413	2.10432	1.14673
380	CAAACTGGCAGATGT	cte-mir-1987-p3_1ss8CG	0.950413	2.10432	1.14673
381	TGTCATGGAGTTGCTCTCTTTAAT	cte-miR-281_R+2	1.42562	3.15649	1.14673
382	GGTATTTCTGAGCATA	PC-3p-133814_4	1.90083	4.20865	1.14673
383	TACTTTGTGCCAAAGGTTTCT	PC-3p-235242_2	0.316804	0.701441	1.14673
384	TGAAAGACATGGGCAGTGAGATGTA	cte-miR-71_R+2_1ss14TC	1.90083	5.26081	1.46866
385	TCAGATATGTTTGATATATTTGGTG	lgi-miR-190_L+2R+1_1ss19AT	0.950413	2.6304	1.46866
386	GGATGAGCCTCAGTGGTC	sme-mir-749-p5_1ss12GA	0.475206	1.57824	1.73169
387	AAGGTTACTTGTTAGTTCAG	PC-5p-157260_3	0.950413	3.15649	1.73169
388	NTAAGTACTGGTGCCGCGGGAT	lgi-miR-252a_R+1_1ss1CN	1.90083	6.31297	1.73169
389	TGGACCGAGATTTGT	gsa-miR-184a-3p_R-8_1ss6GC	0.950413	3.15649	1.73169
390	CGATAGAACAATGTAGT	PC-3p-240914_2	0.950413	3.15649	1.73169
391	ATAAGTAGTGGTGCCGCAGGTATT	lgi-miR-252b_R+2	0.950413	3.15649	1.73169
392	AGAACTGATAAGGGA	lgi-miR-184_L-7_1ss22CA	0.950413	3.15649	1.73169
393	TGTGATTTGAGGCATTCTGT	PC-3p-254713_2	0.950413	3.15649	1.73169
394	TGCTCTTTTAACGATCATAATGT	PC-3p-815023_1	0.950413	3.15649	1.73169
395	AAATGGGTAAGAAGTCGGC	PC-5p-183294_2	0.950413	3.15649	1.73169
396	NCAGATCTAACTCTTCCAGCTCT	lgi-miR-750_L+1_1ss23AT	0.316804	1.05216	1.73169
397	TATTATGCTGCTATTCACGAGT	PC-3p-59660_21	2.85124	9.99554	1.8097
398	TGCCAAGGATGATAAAAATT	PC-5p-104529_6	1.90083	8.4173	2.14673
399	NTAAGAGGTCTTTGC	PC-3p-155729_3	0.950413	4.20865	2.14673
400	TGAGATTCAACTCCTCCAACTGTAG	PC-3p-106788_6	0.950413	5.26081	2.46866
401	GTTGTGGGCGTGGGT	hru-mir-1986-p5_1ss11CT	0.950413	5.26081	2.46866
402	TAATATCAGCTGGTAATCCTNAGA	cte-miR-216b_R+2_2ss18TC21GN	0.475206	3.15649	2.73169
403	CCAGATCTAACTCTTCCAGCTCTA	sme-miR-750-3p_R+1_2ss1TC20TC	0.316804	2.10432	2.73169
404	TATCACAGCCCGCTTGGATCA	cte-miR-2g_R-2_1ss9AC	0.001	0.526081	9.03914
405	CTGAAGTCTGAAAGG	egr-mir-4988-p3_1ss2GT	0.001	0.526081	9.03914
406	TAAAGATGCCTGCTC	sma-mir-8-p3_1ss11AT	0.001	0.526081	9.03914
407	ACAGTCAGCTTTGATGAGT	lgi-miR-2c_L-4_1ss9CT	0.001	0.999554	9.96514
408	ATACATGTTTTAAAAAACATA	PC-5p-893531_1	0.001	1.05216	10.0391
409	AGGTTGTGAGTAGAGCAATC	PC-5p-1026487_1	0.001	1.05216	10.0391
410	ACAGCCAGCTTTGATGCCT	lgi-mir-2c-p3_2ss17AC18GC	0.001	1.05216	10.0391
411	CGACCCGGGTGAAGG	sma-mir-8475-p3_1ss2TG	0.001	1.05216	10.0391
412	CATTAAGAAGGAACT	sma-mir-8431-p5_1ss12GA	0.001	1.05216	10.0391
413	GATTCCCCCAGTGTC	hru-mir-1984-p3_1ss8AC	0.001	1.05216	10.0391
414	TTTTTTGTTAGTGGC	sma-mir-8421-p3_1ss13TG	0.001	1.05216	10.0391
415	GGGACCTAAAGGTGAT	sma-mir-8438-p5_1ss14TG	0.001	1.05216	10.0391
416	CAATGTTGGTTAGTTG	sme-mir-277d-p5_1ss1AC	0.001	1.05216	10.0391
417	TGGTTATCTAAGTCAAGGTC	PC-5p-674385_1	0.001	1.05216	10.0391
418	ATTTGAAATCAGTGC	cte-miR-29b_L-7R+1	0.001	1.05216	10.0391
419	ACAAACTGTTGATGG	sme-mir-2149-p5_1ss15AG	0.001	1.05216	10.0391
420	AGCTCCTCCTTTGGTCA	PC-5p-870265_1	0.001	1.05216	10.0391
421	TAAGGCACGCGGTGAATGCCAGAG	sme-miR-124c-3p_R+3	0.001	1.05216	10.0391
422	AGTCTAAGTCTAAGTCTAAGTC	PC-5p-939418_1	0.001	1.05216	10.0391
423	AATATTGGATGATGG	sja-miR-2a-5p_L-5R-2_1ss14CA	0.001	1.05216	10.0391
424	GTTGAATTTTCTGCCT	sme-let-7a-3p_L-3R-4_1ss7CG	0.001	1.05216	10.0391
425	ATCTATAGAATGCCTGGAT	PC-3p-815729_1	0.001	1.05216	10.0391
426	TGTGTATTTTGTAACACTG	PC-3p-393031_1	0.001	1.05216	10.0391
427	GGAGATTTGTAGAAA	sma-mir-8430-p5_1ss9AG	0.001	1.05216	10.0391
428	TGATGATGACTTTGAAGAC	PC-3p-530607_1	0.001	1.05216	10.0391
429	TTGTGATCTTCGGAC	sja-mir-2d-p5_1ss8TC	0.001	1.05216	10.0391
430	TCGCTCTGAGTTACT	cte-miR-2687_L-7_1ss16GA	0.001	1.05216	10.0391
431	TGGTCTAGTATGGTT	sma-mir-8420-p3_1ss7TA	0.001	1.05216	10.0391
432	GAACTGATGGAGGCT	sja-mir-3493-p3_1ss12TG	0.001	1.05216	10.0391
433	ATTGCTCCATAGAATT	lgi-mir-750-p5_1ss5TC	0.001	1.05216	10.0391
434	TGGAACTGACACAAG	cte-mir-2721-p3_1ss11GA	0.001	1.05216	10.0391
435	CAATACCGTTTGGGTC	sme-mir-133b-p5_1ss4AT	0.001	1.05216	10.0391
436	GACTTTATACACTAGGACT	PC-3p-791418_1	0.001	1.05216	10.0391
437	CATTGTGACCCTCTGT	cte-mir-1995-p5_1ss11AC	0.001	1.05216	10.0391
438	TTACCTGAAATTACTAAACT	PC-5p-466792_1	0.001	1.05216	10.0391
439	ATCTCTATTTACATC	gsa-mir-36-p3_1ss8AT	0.001	1.05216	10.0391
440	AAAATTCAAAGTGTT	sma-mir-8450-p5_1ss8CA	0.001	1.05216	10.0391
441	TGTTTTTGTCGTTGGTT	lgi-mir-9-p5_1ss11TG	0.001	1.05216	10.0391
442	ACCCTAAACTGAGAATATTT	PC-3p-1020711_1	0.001	1.05216	10.0391
443	TCCACTGAACTGATG	sja-mir-3493-p5	0.001	1.05216	10.0391
444	GTGGCTGTGTCTGGT	cte-mir-2d-1-p5_1ss13TG	0.001	1.05216	10.0391
445	ATCAACAGCAAAACC	sme-mir-2176-p5_1ss6AC	0.001	1.05216	10.0391
446	ACCCGGGGTTGACGC	cte-mir-242-p3_1ss6TG	0.001	1.05216	10.0391
447	AAGTAATCTATTTTTCATT	PC-5p-634810_1	0.001	1.05216	10.0391
448	TACTGGCCTCCAAAATCCCAAC	lgi-miR-193_1ss10GC	0.001	1.05216	10.0391
449	GAACCATTTAGTAGACATT	PC-5p-535536_1	0.001	1.05216	10.0391
450	TGGACGGAGAACTGATAGT	cte-miR-184b_R-2_1ss19GT	0.001	1.05216	10.0391
451	AGAGTTCGAATGTCAAAGT	PC-5p-1024423_1	0.001	1.05216	10.0391
452	AATGTTCAGATAATCTTTTC	PC-5p-761747_1	0.001	1.05216	10.0391
453	TAATTGAGATTTCCAAC	sma-miR-8414-3p_L-3R+1	0.001	1.05216	10.0391
454	CAGTGGAGAGAGTTTTATCTCATCT	cte-miR-1175-5p_L+1R+2	0.001	1.05216	10.0391
455	AAATCTTTTTAATTT	gsa-mir-87-p3_1ss12CA	0.001	1.05216	10.0391
456	GTACTGTTACTTGTT	sja-mir-133-p3_1ss1AG	0.001	1.05216	10.0391
457	TCCCAGAGGTCAAAC	gsa-miR-9404-5p_L-3R-4_1ss6TC	0.001	1.05216	10.0391
458	TGACTAGATCCACACTCATCCTC	lgi-miR-279_R+1_1ss22AT	0.001	1.05216	10.0391
459	CAAGATTTGTGGTTAC	cte-mir-1990b-p3_1ss6CT	0.001	1.05216	10.0391
460	GTTGATGATGAAAAT	gsa-mir-10b-p5_1ss1TG	0.001	1.05216	10.0391
461	TGCAATCTGGGATTC	sma-mir-8417-p5_1ss5GA	0.001	1.05216	10.0391
462	GATTGCTGATAAGATATTT	PC-3p-190337_2	0.001	2.10432	11.0391
463	CCATAGGTGTTGGTTGATT	PC-3p-186096_2	0.001	2.10432	11.0391
464	ATTTTTGGGTGCCTAGAGTTA	PC-3p-534646_1	0.001	2.10432	11.0391
465	AGTAGTTGTATTAAGT	sma-mir-8482-p3_1ss5TG	0.001	2.10432	11.0391
466	TTTGCCAAAGTATTTATTT	PC-5p-210111_2	0.001	2.10432	11.0391
467	GTTGTTTGTATAGATTGTTA	PC-5p-236993_2	0.001	2.10432	11.0391
468	AAGAAAGCTCGTAGT	sma-mir-8433-p5_1ss2CA	0.001	2.10432	11.0391
469	TTGTGACCGTTATAATGGGCATTGT	PC-5p-174018_2	0.001	2.10432	11.0391
470	TCTTCCTTTAGACACTGCC	PC-3p-177644_2	0.001	2.10432	11.0391
471	CTGAAGACTGTGGTAAAGACC	PC-5p-322096_1	0.001	2.10432	11.0391
472	AGCCTGAATAAATGGTGCA	PC-5p-474055_1	0.001	2.10432	11.0391
473	AAGGGAGCATCCGTCGACAGTTT	lgi-miR-281-5p_R+2_1ss12TC	0.001	2.10432	11.0391
474	ATGTGATTTGTGTGATAGT	PC-3p-235636_2	0.001	2.10432	11.0391
475	AATGTAAAGAAGTATGTATCGTT	PC-3p-678057_1	0.001	2.10432	11.0391
476	TACTGATGACAAGTGGGGC	PC-3p-618731_1	0.001	2.10432	11.0391
477	CGCCGCGTGCGGGGTGACT	PC-3p-259412_2	0.001	2.10432	11.0391
478	ATGACTGGTTTATAAATCATT	PC-5p-144785_3	0.001	3.15649	11.6241
479	AGAGGTCTTGGGTACGAAA	PC-5p-186769_2	0.001	3.15649	11.6241
480	TGGATTTCCCAAGATCCGTGAT	lgi-miR-1986	0.001	3.15649	11.6241
481	GCTATCCGCTCTGAAGACA	PC-5p-588283_1	0.001	3.15649	11.6241
482	CTGGTAGAATTCACTG	cte-miR-182_L-7R+1	0.001	5.26081	12.3611

## Sheet: Log2 mature miRNA
miRNA Sequence	miRNA name	Normalized EtOH CNS	Normalized RA CNS	Log2 (ETOH_CNS/RA_CNS)
TGAGACAGTGTGTCCTCCCATGT	lgi-miR-1994a_R+1_1ss20TA	2.85124	21.0432	2.8837
CTTGGCACTGGCGGAATAGTCA	lgi-miR-96a_1ss19AG	162.521	1822.34	3.4871
TAAGGCACGCGGTGAATGATT	sme-miR-124a-3p_1ss19CA	0.001	16.8346	14.0391
TAAAGCTAGGTTACCAAAGGNAT	lgi-miR-9-3p_L-1R+2_1ss22CN	2.85124	0.001	-11.4774
CCTGAGACCATAATA	sme-miR-125b-5p_L-2R-5_1ss10TC	2.85124	0.001	-11.4774
TGAACACAGCTGGTGGTATCTTTTTT	cte-miR-317_R+1_1ss22CT	2.85124	0.001	-11.4774
TGCCATTTTTATCAGTCACTGTGTTCT	hru-miR-1985_R+4	2.85124	0.001	-11.4774
TAAATGAATGAAAGA	sme-let-7d-p3_1ss8TA	1.90083	0.001	-10.8924
GATGTGATCTGAGATT	gsa-bantam-p5_1ss1CG	0.950413	0.001	-9.89241
GCAGATCGGTGGTAG	sja-miR-3500_L-1R-5_1ss3GC	0.950413	0.001	-9.89241
ACTTTGTTTTATTTT	sma-miR-8456-5p_L-2R-2	0.950413	0.001	-9.89241
AGATTTTGATGAATT	sme-miR-2157-3p_L-1R-6_1ss4TA	0.950413	0.001	-9.89241
ATTTGGCACTTGTGTAATAATCGA	lgi-miR-96b_R+1_1ss15GT	0.950413	0.001	-9.89241
TCCCTGAGACCCTTTAA	sja-miR-125a_R-5_1ss16GA	0.950413	0.001	-9.89241
GGCTGCCTGATGAAGAGCT	lgi-miR-745a_R-2_1ss1AG	0.950413	0.001	-9.89241
CTGTACAACCTTCTAGCTTTC	lgi-let-7-p3	0.950413	0.001	-9.89241
TGAGACAGTGCGTCCTCCCTCAGGC	lgi-miR-1994b_R+3_1ss11TC	0.950413	0.001	-9.89241
ATCGGTTAGGACGCC	egr-miR-8_L-8_1ss9TA	0.950413	0.001	-9.89241
TCGTCCTTTGCCTCT	cte-miR-2715_L-8R-1_1ss14TC	0.950413	0.001	-9.89241
TGTCATGGAGTTGCTCTTTA	gsa-miR-281-3p_R-2_1ss19CT	0.475206	0.001	-8.89241
TAATATCAGCTGGTAATCCTNAGA	cte-miR-216b_R+2_2ss18TC21GN	0.475206	3.15649	2.73169
CCAGATCTAACTCTTCCAGCTCTA	sme-miR-750-3p_R+1_2ss1TC20TC	0.316804	2.10432	2.73169
TATCACAGCCCGCTTGGATCA	cte-miR-2g_R-2_1ss9AC	0.001	0.526081	9.03914
ACAGTCAGCTTTGATGAGT	lgi-miR-2c_L-4_1ss9CT	0.001	0.999554	9.96514
ATTTGAAATCAGTGC	cte-miR-29b_L-7R+1	0.001	1.05216	10.0391
TAAGGCACGCGGTGAATGCCAGAG	sme-miR-124c-3p_R+3	0.001	1.05216	10.0391
AATATTGGATGATGG	sja-miR-2a-5p_L-5R-2_1ss14CA	0.001	1.05216	10.0391
GTTGAATTTTCTGCCT	sme-let-7a-3p_L-3R-4_1ss7CG	0.001	1.05216	10.0391
TCGCTCTGAGTTACT	cte-miR-2687_L-7_1ss16GA	0.001	1.05216	10.0391
TACTGGCCTCCAAAATCCCAAC	lgi-miR-193_1ss10GC	0.001	1.05216	10.0391
TGGACGGAGAACTGATAGT	cte-miR-184b_R-2_1ss19GT	0.001	1.05216	10.0391
TAATTGAGATTTCCAAC	sma-miR-8414-3p_L-3R+1	0.001	1.05216	10.0391
CAGTGGAGAGAGTTTTATCTCATCT	cte-miR-1175-5p_L+1R+2	0.001	1.05216	10.0391
TCCCAGAGGTCAAAC	gsa-miR-9404-5p_L-3R-4_1ss6TC	0.001	1.05216	10.0391
TGACTAGATCCACACTCATCCTC	lgi-miR-279_R+1_1ss22AT	0.001	1.05216	10.0391
AAGGGAGCATCCGTCGACAGTTT	lgi-miR-281-5p_R+2_1ss12TC	0.001	2.10432	11.0391
TGGATTTCCCAAGATCCGTGAT	lgi-miR-1986	0.001	3.15649	11.6241
CTGGTAGAATTCACTG	cte-miR-182_L-7R+1	0.001	5.26081	12.3611

## Sheet: Log2 novel miRNAs
miRNA Sequence	miRNA name	Normalized EtOH CNS	Normalized RA CNS	Log2 (ETOH_CNS/RA_CNS)
GGGGGTAGAGCACTGT	PC-3p-118043_5	27.562	0.001	-14.7504
CTGAAGATACTAAAAAGG	PC-5p-89368_9	13.3058	0.001	-13.6998
CGTGAGACAGTTTGGTC	PC-5p-117459_5	10.4545	1.05216	-3.3127
CTTGGCACTGGCGGAATAGTCACT	PC-5p-23426_87	16.157	155.72	3.26872
CTTGGCACCAAAGAATTCACTGA	PC-5p-44031_36	3.80165	42.0865	3.46866
AGCCTTGGACCAGGAGATT	PC-3p-8526_233	11.405	360.892	4.98383
CCCGTGGGACCCGGGT	PC-3p-72816_14	0.001	18.9389	14.2091
TTTACATTGGACTTTGAAATT	PC-5p-193085_2	6.65289	0.001	-12.6998
TCAGCTCCCCCTGGAGCC	PC-3p-138319_3	5.70248	0.001	-12.4774
AGAGGGGGTTGCGACTGTT	PC-5p-397978_1	4.75206	0.001	-12.2143
AGCTGTGTCATATGTTGCCAAT	PC-3p-149634_3	4.75206	0.001	-12.2143
CCGAGAGGGAAAGAACC	PC-5p-182416_2	2.85124	0.001	-11.4774
CCTCTTTCAGTGGGATTGTG	PC-5p-193863_2	2.85124	0.001	-11.4774
GCCAACCAGGAGATTTGT	PC-5p-243528_2	2.85124	0.001	-11.4774
CACAGTAAATACTTCATCT	PC-5p-212535_2	1.90083	0.001	-10.8924
AAAACAAATGTTGACGCAA	PC-3p-178105_2	1.90083	0.001	-10.8924
TCCCGTGGTCACAACCTGC	PC-5p-674964_1	1.90083	0.001	-10.8924
TAAGCTTTTGTTGATTTTCT	PC-5p-303926_1	1.90083	0.001	-10.8924
TCAATTGAAATGTTAGGCC	PC-5p-264847_2	1.90083	0.001	-10.8924
TACTAGAAATCTAGTAAAA	PC-3p-324225_1	1.90083	0.001	-10.8924
TAAGAAGAGGAAACTCTGGT	PC-3p-213137_2	1.90083	0.001	-10.8924
GGTGTTGGTTGATTTAGG	PC-3p-301479_1	1.90083	0.001	-10.8924
AACCAGCCCTGAAATGGAT	PC-3p-284601_1	1.90083	0.001	-10.8924
TTTATCTATTTTTGTTGTTGCT	PC-5p-188256_2	1.90083	0.001	-10.8924
TGAGGTAGTAGGTTGTAGT	PC-5p-925269_1	1.90083	0.001	-10.8924
TATGAACTGAAATCTTGGC	PC-5p-672301_1	1.90083	0.001	-10.8924
GGATTTTTTGGGACTTATT	PC-5p-207407_2	1.90083	0.001	-10.8924
TTAAGTATTGTTGTATATT	PC-5p-853944_1	1.90083	0.001	-10.8924
TTTTCCTGAATGTTATTTTT	PC-5p-249366_2	1.90083	0.001	-10.8924
TATAACATCAGGAAGCAATA	PC-3p-243260_2	1.90083	0.001	-10.8924
TCGAGCTGAAACTTGGCACA	PC-3p-639729_1	1.90083	0.001	-10.8924
ATGGTGCAAAGTTTAAATT	PC-3p-791283_1	1.90083	0.001	-10.8924
CTAGAGAAAAGTAGGGCGG	PC-5p-873354_1	1.90083	0.001	-10.8924
TGGAAAGGTTGTTGAAGTT	PC-5p-639172_1	0.950413	0.001	-9.89241
AGGATGGCTAGACTTATC	PC-5p-748899_1	0.950413	0.001	-9.89241
TTCTCTGTCTGTTTGTTTCTCT	PC-3p-953788_1	0.950413	0.001	-9.89241
ATCCGACTTTCTAATTAAA	PC-5p-679290_1	0.950413	0.001	-9.89241
TGAAAAGAACTGAAGAGAG	PC-5p-613526_1	0.950413	0.001	-9.89241
ACTACAGCGTAGAGATGTCT	PC-3p-766388_1	0.950413	0.001	-9.89241
TGATGGTGGATGTTGATGG	PC-5p-543205_1	0.950413	0.001	-9.89241
TTGTTTTTTGTTTCTGTCC	PC-5p-258157_2	0.950413	0.001	-9.89241
TGTTGTTAAATGTTGTTGT	PC-5p-705372_1	0.950413	0.001	-9.89241
TCTTGATCAACACAGAGA	PC-5p-973126_1	0.950413	0.001	-9.89241
TCACAAGTGGAAGAGGGG	PC-3p-948998_1	0.950413	0.001	-9.89241
ATCATGGCAATGTGTGACT	PC-5p-917692_1	0.950413	0.001	-9.89241
CTTATTAAATAGGTTTGGGG	PC-3p-683062_1	0.950413	0.001	-9.89241
CAATGTATGTAAGCTGAAA	PC-5p-426062_1	0.950413	0.001	-9.89241
AACAGATTGTGCGGTGCCC	PC-3p-579831_1	0.950413	0.001	-9.89241
TTTTGATTGTTGCTCAGAAAGCCGAT	PC-5p-414557_1	0.475206	0.001	-8.89241
AGGAATAATCTGAAGATCATCT	PC-5p-158067_3	5.70248	1.05216	-2.43823
ATAGGATATAATATACTT	PC-5p-137809_4	4.75206	1.05216	-2.1752
AGTAATTACTTGTTGTTT	PC-3p-122044_4	2.37603	0.526081	-2.1752
TGCCAAGGATGATAAAAATT	PC-5p-104529_6	1.90083	8.4173	2.14673
NTAAGAGGTCTTTGC	PC-3p-155729_3	0.950413	4.20865	2.14673
TGAGATTCAACTCCTCCAACTGTAG	PC-3p-106788_6	0.950413	5.26081	2.46866
ATACATGTTTTAAAAAACATA	PC-5p-893531_1	0.001	1.05216	10.0391
AGGTTGTGAGTAGAGCAATC	PC-5p-1026487_1	0.001	1.05216	10.0391
TGGTTATCTAAGTCAAGGTC	PC-5p-674385_1	0.001	1.05216	10.0391
AGCTCCTCCTTTGGTCA	PC-5p-870265_1	0.001	1.05216	10.0391
AGTCTAAGTCTAAGTCTAAGTC	PC-5p-939418_1	0.001	1.05216	10.0391
ATCTATAGAATGCCTGGAT	PC-3p-815729_1	0.001	1.05216	10.0391
TGTGTATTTTGTAACACTG	PC-3p-393031_1	0.001	1.05216	10.0391
TGATGATGACTTTGAAGAC	PC-3p-530607_1	0.001	1.05216	10.0391
GACTTTATACACTAGGACT	PC-3p-791418_1	0.001	1.05216	10.0391
TTACCTGAAATTACTAAACT	PC-5p-466792_1	0.001	1.05216	10.0391
ACCCTAAACTGAGAATATTT	PC-3p-1020711_1	0.001	1.05216	10.0391
AAGTAATCTATTTTTCATT	PC-5p-634810_1	0.001	1.05216	10.0391
GAACCATTTAGTAGACATT	PC-5p-535536_1	0.001	1.05216	10.0391
AGAGTTCGAATGTCAAAGT	PC-5p-1024423_1	0.001	1.05216	10.0391
AATGTTCAGATAATCTTTTC	PC-5p-761747_1	0.001	1.05216	10.0391
GATTGCTGATAAGATATTT	PC-3p-190337_2	0.001	2.10432	11.0391
CCATAGGTGTTGGTTGATT	PC-3p-186096_2	0.001	2.10432	11.0391
ATTTTTGGGTGCCTAGAGTTA	PC-3p-534646_1	0.001	2.10432	11.0391
TTTGCCAAAGTATTTATTT	PC-5p-210111_2	0.001	2.10432	11.0391
GTTGTTTGTATAGATTGTTA	PC-5p-236993_2	0.001	2.10432	11.0391
TTGTGACCGTTATAATGGGCATTGT	PC-5p-174018_2	0.001	2.10432	11.0391
TCTTCCTTTAGACACTGCC	PC-3p-177644_2	0.001	2.10432	11.0391
CTGAAGACTGTGGTAAAGACC	PC-5p-322096_1	0.001	2.10432	11.0391
AGCCTGAATAAATGGTGCA	PC-5p-474055_1	0.001	2.10432	11.0391
ATGTGATTTGTGTGATAGT	PC-3p-235636_2	0.001	2.10432	11.0391
AATGTAAAGAAGTATGTATCGTT	PC-3p-678057_1	0.001	2.10432	11.0391
TACTGATGACAAGTGGGGC	PC-3p-618731_1	0.001	2.10432	11.0391
CGCCGCGTGCGGGGTGACT	PC-3p-259412_2	0.001	2.10432	11.0391
ATGACTGGTTTATAAATCATT	PC-5p-144785_3	0.001	3.15649	11.6241
AGAGGTCTTGGGTACGAAA	PC-5p-186769_2	0.001	3.15649	11.6241
GCTATCCGCTCTGAAGACA	PC-5p-588283_1	0.001	3.15649	11.6241
